# Supplementary material for: Experimental Investigation of Mechanical and Thermal Properties of Silica Nanoparticle-Reinforced Poly(acrylamide) Nanocomposite Hydrogels
Source: PLOS journal article supplement (doi:10.1371/journal.pone.0136293), 2015-08-24

# Experimental investigation of mechanical and thermal properties of silica nanoparticle-reinforced poly(acrylamide) nanocomposite hydrogels

\*Corresponding authors: [hlee@scu.edu](mailto:hlee@scu.edu) and [asurip@scu.edu](mailto:asurip@scu.edu)

## S1 Fig. Preparation of pAAm hydrogel disks.

(a) Dimensions of the acrylic mold used for the preparation of pAAm hydrogel disks. (b) In Step 1, 210  $\mu\text{L}$  of the reaction mixture, either containing or not containing nanoparticles, was pipetted into individual molds. A glass slide was placed on the samples to limit exposure to oxygen, which inhibits the polymerization reaction (Step 2). After waiting for 1 hour to ensure complete gelation, the hydrogel discs were taken from the mold for further testing (Step 3).

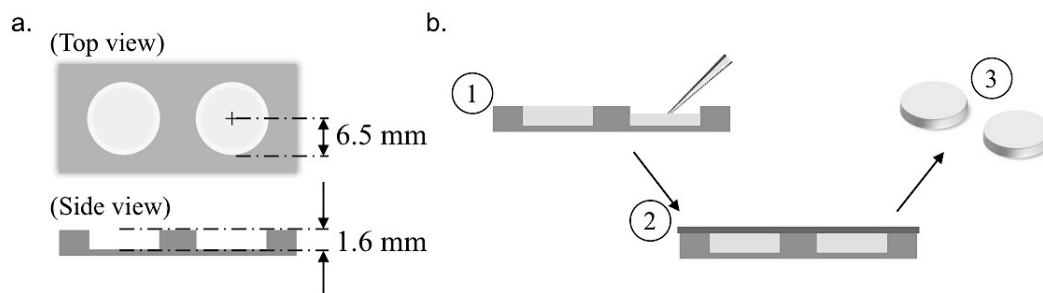

Supplement: S1 (10.1371/journal.pone.0136293.s001) [file journal.pone.0136293.s001]
